# Supplementary material
Source: publisher site journal article supplement (https://www.spandidos-publications.com/8380/downloadSupplementary)
Supplement: Supplementary file 1 [file downloadSupplementary]

**Table SI.** Mobile phase gradients.

| Time (min) | A%    | B%     |
|------------|-------|--------|
| 0-5        | 0-20  | 100-80 |
| 5-25       | 20-40 | 80-60  |
| 25-35      | 40-45 | 60-55  |
| 35-45      | 45-60 | 55-40  |
| 45-60      | 60-90 | 40-10  |
| 60-63      | 90    | 10     |
| 63-63.1    | 90-0  | 10-100 |
| 63.1-66    | 0     | 100    |

Column: Waters CORTECS C8 UPLC<sup>®</sup> T3 (2.1x100pin; 1.6 ufm), mobile phase (A) acetonitrile (B) 0.1% formic acid aqueous solution; injection volume of 2  $\mu$ l, flow rate of 0.3 ml/min, column temperature 30°C, gradient elution.

**Table SII.** Mass spectrometry parameters.

| MS parameters                 | Parameter value | MS/MS Parameters             | Parameter value |
|-------------------------------|-----------------|------------------------------|-----------------|
| TOF mass range                | 50-1700         | MS/MS mass range             | 50-1250         |
| Ion source gas 1 (psi)        | 50              | Declustering potential (V)   | 100             |
| Ion source gas 2 (psi)        | 50              | Collision energy (eV)        | ±40             |
| Curtain gas (psi)             | 35              | Collision energy spread (eV) | 20              |
| Ion spray voltage floating(V) | -4500/5000      | Ion release delay (msec)     | 30              |
| Ion source temperature(°C)    | 500             | Ion release width (msec)     | 15              |
| Declustering potential (V)    | 100             |                              |                 |
| Collision energy (eV)         | 10              |                              |                 |

Mass spectrometry conditions: Mass spectrometry detection mode is electrospray ionization source (-positive/negative ion mode, mass spectrometry parameters. MS, mass spectrometry; TOF, time-of-flight.
